# Supplementary material for: Immature Circulating SP-B, Bound to HDL, Represents an Early Sign of Smoke-Induced Pathophysiological Alterations
Source: PubMed Central journal article supplement (PMC8069080; doi:10.3390/biom11040551), 2021-04-09
Supplement: biomolecules-11-00551-s001.pdf [file biomolecules-11-00551-s001.pdf]

**Table S1**• Univariable Spearman correlations.

| Variable               |                | HDL-SPB | Gender  | Age    | Cigarettes/d ay | smoking years | pack-years | HSA-cys | CRP    | IL-6    | WBC     | DLCO    | DLNO    | HDL-C   |
|------------------------|----------------|---------|---------|--------|-----------------|---------------|------------|---------|--------|---------|---------|---------|---------|---------|
| <b>HDL-SPB</b>         | <i>r value</i> | 1.000   | 0.147   | 0.134  | 0.605#          | 0.544#        | 0.589#     | 0.007   | -0.070 | 0.071   | 0.257§  | 0.017   | 0.104   | -0.351# |
| <b>Gender</b>          | <i>r value</i> | 0.147   | 1.000   | 0.038  | 0.148           | 0.098         | 0.124      | 0.152   | -0.150 | 0.064   | -0.043  | 0.762#  | 0.803#  | -0.515# |
| <b>Age</b>             | <i>r value</i> | 0.134   | 0.038   | 1.000  | 0.155           | 0.292§        | 0.248*     | 0.046   | -0.147 | 0.036   | 0.075   | -0.095  | -0.095  | -0.128  |
| <b>Cigarettes/d ay</b> | <i>r value</i> | 0.605#  | 0.148   | 0.155  | 1.000           | 0.912#        | 0.974#     | -0.131  | 0.021  | 0.017   | 0.139   | -0.092  | 0.048   | -0.238* |
| <b>Smoking years</b>   | <i>r value</i> | 0.544#  | 0.098   | 0.292§ | 0.912#          | 1.000         | 0.972#     | -0.115  | 0.003  | 0.046   | 0.132   | -0.142  | -0.028  | -0.217* |
| <b>Pack-years</b>      | <i>r value</i> | 0.589#  | 0.124   | 0.248* | 0.974#          | 0.972#        | 1.000      | -0.104  | 0.016  | 0.028   | 0.141   | -0.119  | 0.016   | -0.236* |
| <b>HSA-cys</b>         | <i>r value</i> | 0.007   | 0.152   | 0.046  | -0.131          | -0.115        | -0.104     | 1.000   | 0.102  | 0.048   | 0.163   | 0.196   | 0.190   | 0.027   |
| <b>CRP</b>             | <i>r value</i> | -0.070  | -0.150  | -0.147 | 0.021           | 0.003         | 0.016      | 0.102   | 1.000  | 0.449#  | 0.265*  | -0.066  | -0.131  | 0.116   |
| <b>IL-6</b>            | <i>r value</i> | 0.071   | 0.064   | 0.036  | 0.017           | 0.046         | 0.028      | 0.048   | 0.449# | 1.000   | 0.379#  | 0.034   | -0.003  | -0.309§ |
| <b>WBC</b>             | <i>r value</i> | 0.257§  | -0.043  | 0.075  | 0.139           | 0.132         | 0.141      | 0.163   | 0.265* | 0.379#  | 1.000   | -0.094  | -0.101  | -0.262* |
| <b>DLCO</b>            | <i>r value</i> | 0.017   | 0.762#  | -0.095 | -0.092          | -0.142        | -0.119     | 0.196   | -0.066 | 0.034   | -0.094  | 1.000   | 0.938#  | -0.328§ |
| <b>DLNO</b>            | <i>r value</i> | 0.104   | 0.803#  | -0.095 | 0.048           | -0.028        | 0.016      | 0.190   | -0.131 | -0.003  | -0.101  | 0.938#  | 1.000   | -0.395# |
| <b>HDL-C</b>           | <i>r value</i> | -0.351# | -0.515# | -0.128 | -0.238*         | -0.217*       | -0.236*    | 0.027   | 0.116  | -0.309§ | -0.262* | -0.328§ | -0.395# | 1.000   |

\*= $\leq 0.05$ , §= $\leq 0.01$  e #= $\leq 0.001$
